# Supplementary material for: Kinetic study on the reversible hydride transfer between methylene blue and thionine
Source: Royal Society of Chemistry journal article supplement (doi:10.1039/b000046i), 2000-01-01
Supplement: suppl.data.doc [file suppl.data.doc]

Supplementary Data

Table S1. Results obtained for reactions between some dyes and

leuco dyes

| Dyes | Leuco Dyes | Results |
| --- | --- | --- |
| T+  MB+  MG+  NMB+  MG+  MG+  MB+  CV+  MB+  T+ | NMBH  NMBH  NMBH  MBH  TH  MBH  CVH  MBH  TH    MBH | Spectral change was small (spectra of T+ and NMB+ are overlapped)  Spectral change was large, but reaction was too fast to be followed by stopped-flow method  Spectral Change was not found, because the reaction is too fast to be followed.  Spectral change was not observed(no reaction)  Spectral change was large, but reaction was too fast to be followed by stopped-flow method  Spectra of MG+ and MB+ are largely overlapped  Spectral change was not observed(no reaction)  Spectral change was not observed(no reaction)  Spectral change was large and reaction rate was proper to be followed.  Spectral change was large and reaction rate was proper to be followed |

Figure captions

Fig. S1. Time dependences of absorption of MB+ at 655 nm after mixing a MBH solution with

T+ solutions. Initial concentrations; (1) [MBH]0 = 1.6×10-5 M, [T+]0 = 2.3×10 -5

M, (2) [MBH]0 = 1.6×10-5 M, [T+]0 = 3.3×10 -5 M, (3) [MBH]0 = 1.6×10-5 M,

[T+]0 = 4.9×10 -5 M and (4) [MBH]0 = 1.6×10-5 M, [T+]0 = 7.3×10 -5 M.

Fig. S2. Time dependences of absorption of MB+ at 655 nm after mixing a MB+ solution with

TH solutions. Initial concentrations; (1) [MB+]0 = 1.8×10-5 M, [TH]0 = 0.76×10 -5

M, (2) [MB+]0 = 1.8×10-5 M, [TH]0 = 1.1×10 -5 M, (3) [MB+]0 = 1.8×10-5 M,

[TH]0 = 1.5×10 -5 M and (4) [MB+]0 = 1.8×10-5 M, [TH]0 = 1.9×10 -5 M.

Fig. S3. Plots of *Y* vs. *t*-*t*0 for the reaction between MBH and T+ in ethanol.

Initial concentrations; (1) [MBH]0 = 1.6×10-5 M, [T+]0 = 2.3×10 -5 M,

(2) [MBH]0 = 1.6×10-5 M, [T+]0 = 3.3×10 -5 M, (3) [MBH]0 = 1.6×10-5 M,

[T+]0 = 4.9×10 -5 M and (4) [MBH]0 = 1.6×10-5 M, [T+]0 = 7.3×10 -5 M.
